# Supplementary material
Source: PubMed Central journal article supplement (PMC10445186)

## Supplemental Online Content

Boos EW, Horta M, Thompson I, Dusetzina SB, Leech AA. Trends in the use of mifepristone for medical management of early pregnancy loss from 2016 to 2020. *JAMA*. Published online July 21, 2023. doi:10.1001/jama.2023.13628

**eFigure.** Flow diagram of the study cohort

This supplemental material has been provided by the authors to give readers additional information about their work.

**eFigure.** Flow diagram of the study cohort

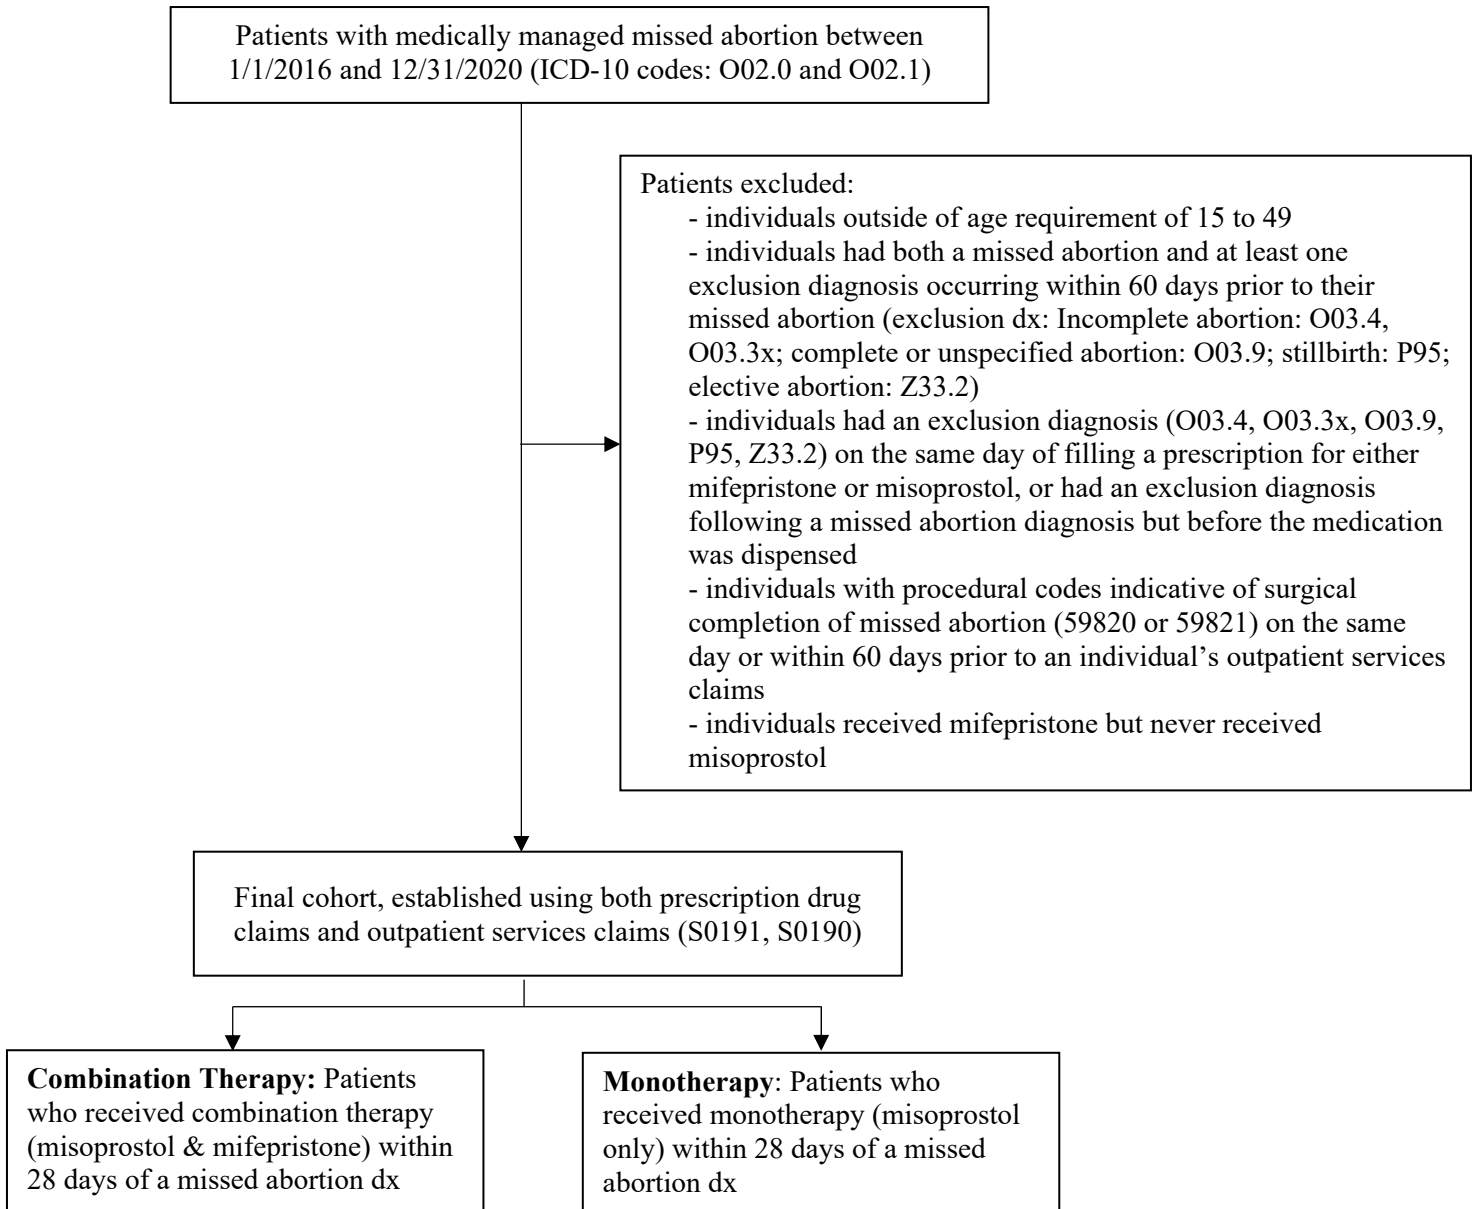

Supplement: jama-e2313628-s001.pdf [file jama-e2313628-s001.pdf]
