# Supplementary material
Source: PubMed Central journal article supplement (PMC10445186)
Supplement: jama-e2313628-s002.pdf [file jama-e2313628-s002.pdf]

## Data Sharing Statement

Boos. Trends in the Use of Mifepristone for Medical Management of Early Pregnancy Loss From 2016 to 2020. *JAMA*. Published July 21, 2023. doi:10.1001/jama.2023.13628

### Data

**Data available:** No

### Additional Information

**Explanation for why data not available:** Our data set includes information obtained from a proprietary claims data base.
